# Supplementary material for: Bromodomain factor 5 is an essential regulator of transcription in Leishmania
Source: PubMed Central journal article supplement (PMC9279504; doi:10.1038/s41467-022-31742-1), 2022-07-13
Supplement: 41467_2022_31742_MOESM3_ESM.pdf [file 41467_2022_31742_MOESM3_ESM.pdf]

## **Description of Additional Supplementary Files**

**Supplementary Data 1:** Excel spreadsheet, List of Oligonucleotides, plasmids, cell lines and antibodies used in this study.

**Supplementary Data 2:** Excel spreadsheet, SAINTq Analysis of BDF5 XL-BioID data to identify proximal proteins, also contains list of remote homology identified in hypothetical proteins by HHPRED analysis.

**Supplementary Data 3:** Excel spreadsheet, BDF5 proximal phosphosites through the cell cycle as determined by limma analysis of phosphoproteomic XL-BioID samples.

**Supplementary Software:** Custom Python code to call peaks once wig files have been obtained from deepTools.
